# Supplementary material
Source: MDPI journal article supplement (https://www.mdpi.com/2073-4441/11/6/1157)

The supplement material provides technical details about the climate and hydrodynamic models employed in the multi-model chain illustrated in the paper “Assessment of climate change impacts in the North Adriatic coastal area. Part I: A multi-model chain for the definition of climate change hazard scenarios.”

**Table S1.** Summary of the technical features of the multi-model chain applied to develop climate change hazard scenarios in the North Adriatic coastal areas.

| Climate change hazard     | Name          | Category                        | Domain             | Spatial resolution                                         | Hazard Metrics       | Time Scenario |
|---------------------------|---------------|---------------------------------|--------------------|------------------------------------------------------------|----------------------|---------------|
| Climate scenarios         | SINTEX G      | Climate Model                   | Global             | Atmospheric resolution 120 km<br>Oceanic resolution 200 km | Air/sea temperature  | 2070-2100     |
|                           |               |                                 |                    |                                                            | Atmospheric pressure |               |
|                           |               |                                 |                    |                                                            | Cloudiness           |               |
|                           | CMCC-MED      | Climate Model                   | Global             | Atmospheric resolution 80 km<br>Oceanic resolution 200 km  | Rainfall             |               |
|                           |               |                                 |                    |                                                            | Relative humidity    |               |
|                           |               |                                 |                    |                                                            | Salinity             |               |
|                           | EBU-POM       | Climate Model                   | Mediterranean sea  | 28 km                                                      | Winds                | 2070-2100     |
|                           |               |                                 |                    |                                                            | Air/sea temperature  |               |
| COSMO-CLM                 | Climate Model | Mediterranean sea               | 14 km              | Atmospheric pressure                                       |                      |               |
|                           |               |                                 |                    | Cloudiness                                                 |                      |               |
|                           |               |                                 |                    | Rainfall                                                   |                      |               |
|                           |               |                                 |                    | Relative humidity                                          |                      |               |
|                           |               |                                 |                    | Salinity                                                   |                      |               |
| Sea level rise scenarios  | SHYFEM        | Ocean and sea Circulation model | North Adriatic sea | 2.5 km-50 metres                                           | Winds                | 2070-2100     |
|                           |               |                                 |                    |                                                            | Water levels         |               |
| Coastal erosion scenarios | SWAN          | Wave model                      | Adriatic sea       | From 5 to 2 km                                             | Current velocity     | 2070-2100     |
|                           |               |                                 |                    |                                                            | Wave energy          |               |
|                           |               |                                 |                    |                                                            | Wave direction       |               |
|                           |               |                                 |                    |                                                            | Wave height          |               |
|                           | ROMS          | Ocean circulation model         | Adriatic sea       | From 5 to 2 km                                             | Wave period          | 2070-2100     |
|                           |               |                                 |                    |                                                            | Bottom stress        |               |
|                           |               |                                 |                    |                                                            | Salinity             |               |
|                           |               |                                 |                    |                                                            | Sea temperature      |               |
|                           |               |                                 |                    |                                                            | 3D currents          |               |

**Figure S1.** Hazard Maps representing the Adriatic sea-level rise (SLR) for the year 2100. Sea-level changes are simulated by the SHYFEM model according to a SLR at Otranto of 20 cm (low scenario, a); and of 45 cm (b, high scenario).

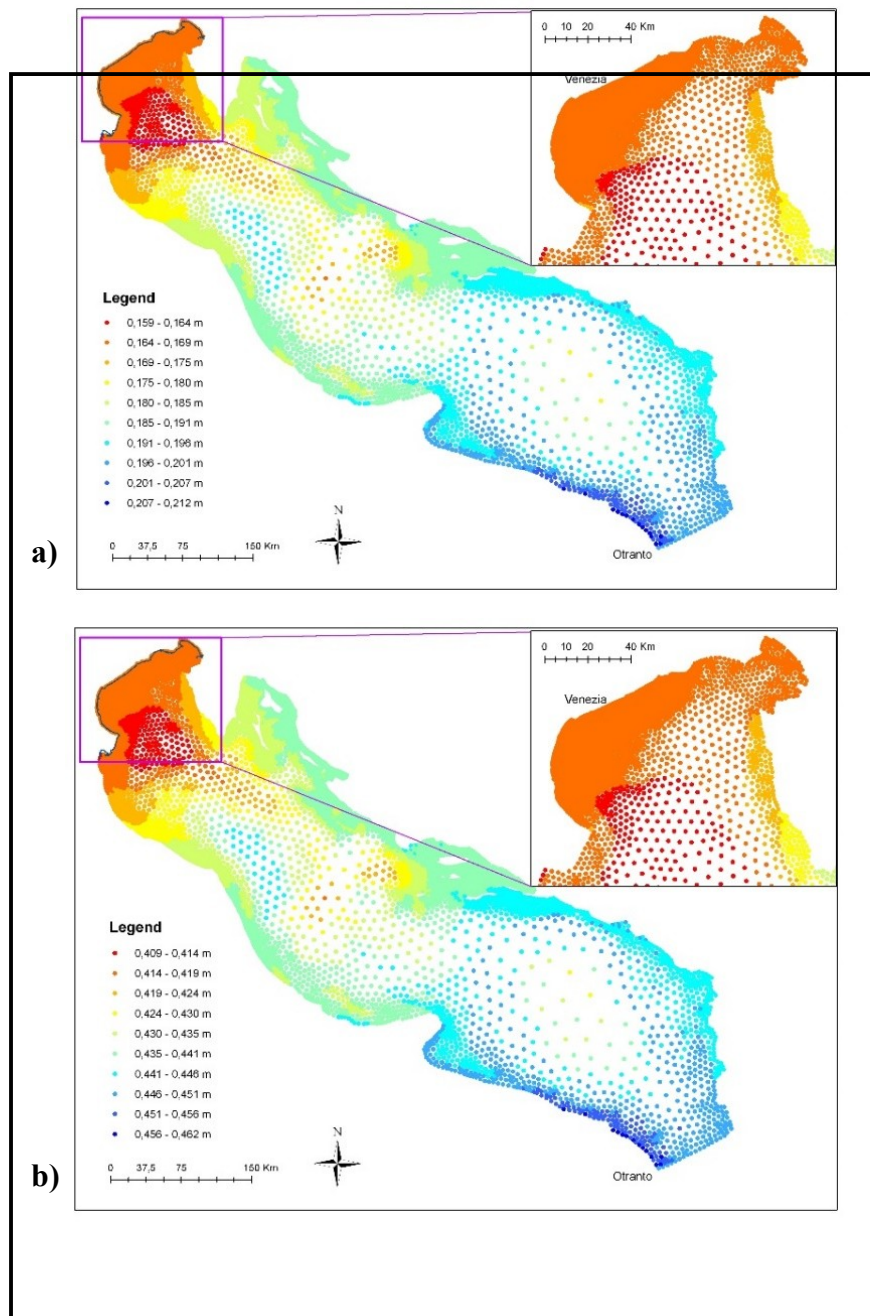

Supplement: s1 [file s1]
